# Supplementary material
Source: bioRxiv or medRxiv preprint supplement (https://medrxiv.org/highwire/filestream/69077/field_highwire_adjunct_files/9/19006221-8.pdf)
Supplement: Supplementary file [file 19006221-8.pdf]

**Table S1.** Adjustment of the association (by Spearman's rank correlation) between sperm DNA fragmentation index (%DFI) and age for possible confounding factors

| Confounder                    | $\rho$ (p-value)                         |
|-------------------------------|------------------------------------------|
| None                          | 0.5661428 ( $1.044 \times 10^{-15}$ )    |
| Abstinence time               | 0.525739 ( $2.536657 \times 10^{-12}$ )  |
| Sperm concentration (mill/mL) | 0.5649652 ( $2.304839 \times 10^{-14}$ ) |
| Progressive motility (%)      | 0.4304968 ( $2.508537 \times 10^{-8}$ )  |
| Morphology (% normal forms)   | 0.5368845 ( $7.093121 \times 10^{-13}$ ) |
| Vitality (% live spermatozoa) | 0.4717895 ( $1.842531 \times 10^{-9}$ )  |
| All of the above              | 0.4305702 ( $8.870944 \times 10^{-8}$ )  |
